# Supplementary material
Source: PubMed Central journal article supplement (PMC2795010)
Supplement: NIHMS158828-supplement-Supplementary_Data.pdf [file NIHMS158828-supplement-Supplementary_Data.pdf]

**Supplementary Figures**

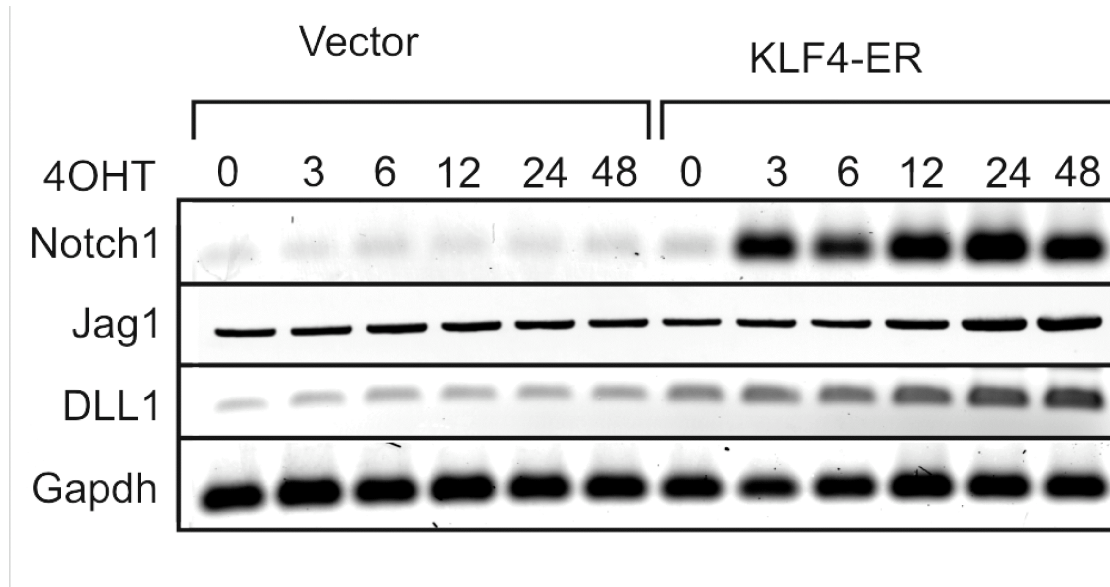

**Supplementary Figure 1. Semi-quantitative RT-PCR analysis of Notch1 ligands.**

Semi-quantitative RT-PCR analysis was performed using total RNA isolated from Vector or KLF4-ER-cells treated with 4OHT for the indicated period. Gapdh served as control.

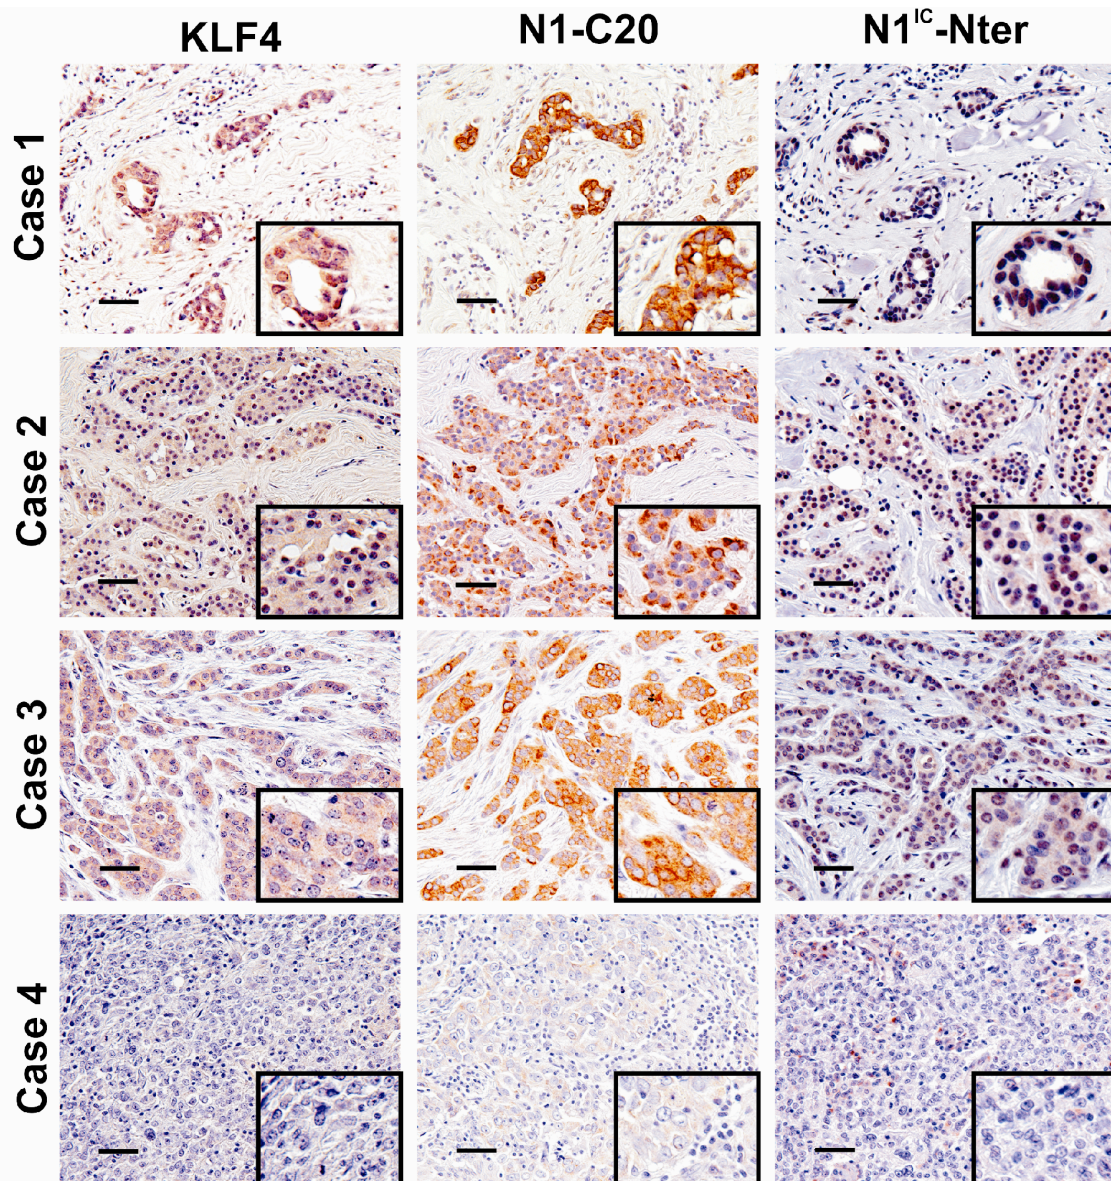

**Supplementary Figure 2. Immunostaining of human breast cancers with antibodies to KLF4, and Notch1 (N1-C20, and N1<sup>IC</sup>-Nter).** Staining of tumor cells is indicated by a brown precipitate. Cases shown are representative of a total of 8 cases with positive staining and 4 cases with low/negative staining. No staining was observed when normal rabbit immunoglobulin was used as the primary antibody (not shown). Scale bar, 50  $\mu$ m.

**Immunostaining analysis of KLF4 and Notch in primary breast cancers  
see Fig 2B**

| <u>Case#</u> | <u>KLF4 CYTO</u> | <u>KLF4 Nuclear</u> | <u>Ntc1 Cyto</u> |
|--------------|------------------|---------------------|------------------|
| breast IDC   |                  |                     |                  |
| 1            | 0                | 0                   | 0                |
| 2            | 0                | 0                   | 0                |
| 3            | 0                | 0                   | 0                |
| 4            | 0                | 0                   | 0                |
| 5            | 0                | 0                   | 0                |
| 6            | 0                | 0                   | 0                |
| 7            | 0                | 0                   | 0                |
| 8            | 0                | 0                   | 0                |
| 9            | 0                | 0                   | 0                |
| 10           | 0                | 0                   | 0                |
| 11           | 0.08             | 0.16                | 0                |
| 12           | 0.3              | 0.3                 | 0                |
| 13           | 0.12             | 0.3                 | 0                |
| 14           | 0                | 0                   | 0.1              |
| 15           | 0.06             | 0.15                | 0.15             |
| 16           | 0.4              | 0.4                 | 0.15             |
| 17           | 0                | 0                   | 0.2              |
| 18           | 0                | 0                   | 0.2              |
| 19           | 0.3              | 0.3                 | 0.2              |
| 20           | 0.3              | 0.3                 | 0.2              |
| 21           | 0.7              | 0.4                 | 0.25             |
| 22           | 0.4              | 0.35                | 0.3              |
| 23           | 0.4              | 0.4                 | 0.3              |
| 24           | 0.5              | 0.25                | 0.4              |
| 25           | 0.3              | 0.3                 | 0.4              |
| 26           | 0.4              | 0.4                 | 0.4              |
| 27           | 0.2              | 0.25                | 0.45             |
| 28           | 0                | 0                   | 0.455            |
| 29           | 0.2              | 0.2                 | 0.56             |
| 30           | 0                | 0                   | 0.6              |
| 31           | 0                | 0                   | 0.6              |
| 32           | 0                | 0                   | 0.66             |
| 33           | 0.3              | 0.3                 | 0.85             |
| 34           | 0.3              | 0.3                 | 1                |
| 35           | 1.75             | 0.375               | 1.1              |
| 36           | 0.3              | 0.3                 | 1.15             |
| 37           | 0.4              | 0.4                 | 1.15             |
| 38           | 0.7              | 0.4                 | 1.35             |
| 39           | 0.3              | 0.3                 | 1.4              |
| 40           | 0.8              | 0.39                | 1.45             |
| 41           | 0.7              | 0.3                 | 1.65             |
| 42           | 0.7              | 0.45                | 1.7              |
| 43           | 0.4              | 0.4                 | 1.8              |
| 44           | 0                | 0                   | 2.3              |
| 45           | 1                | 1                   | 0                |
| 46           | 0.7              | 0.5                 | 0.2              |
| 47           | 0.7              | 0.7                 | 0.2              |

|    |               |              |               |
|----|---------------|--------------|---------------|
| 48 | 0.12          | 1.4          | 0.35          |
| 49 | 0             | 1.5          | 0.375         |
| 50 | 0.5           | 0.5          | 0.4           |
| 51 | 0             | 0.75         | 0.4           |
| 52 | 0             | 0.6          | 0.5           |
| 53 | 0             | 1.3          | 0.55          |
| 54 | 0.6           | 0.5          | 0.6           |
| 55 | 0.76          | 0.9          | 0.7           |
| 56 | 0.5           | 1.4          | 0.73          |
| 57 | 0             | 1            | 0.75          |
| 58 | 1             | 1.25         | 0.8           |
| 59 | 0.2           | 1            | 0.85          |
| 60 | 0.5           | 1.25         | 0.9           |
| 61 | 0             | 1            | 0.95          |
| 62 | 0.5           | 1.125        | 1.05          |
| 63 | 0.28          | 1.35         | 1.05          |
| 64 | 0.3           | 1.3          | 1.1           |
| 65 | 0.6           | 0.6          | 1.15          |
| 66 | 0.5           | 1.15         | 1.25          |
| 67 | 0.5           | 0.5          | 1.3           |
| 68 | 1.5           | 1.35         | 1.3           |
| 69 | 0.75          | 0.75         | 1.4           |
| 70 | 0.5           | 0.95         | 1.4           |
| 71 | 0.5           | 1.45         | 1.4           |
| 72 | 0.51          | 0.51         | 1.5           |
| 73 | 0.85          | 1.15         | 1.5           |
| 74 | 0             | 2            | 1.5           |
| 75 | 0.5           | 1.4          | 1.65          |
| 76 | 0.7           | 0.7          | 1.7           |
| 77 | 0.5           | 1.2          | 1.825         |
| 78 | 2             | 1.45         | 1.9           |
| 79 | 0.5           | 1.5          | 1.9           |
| 80 | 1.25          | 1.5          | 2.05          |
| 81 | 1             | 1            | 2.25          |
| 82 | 0.5           | 0.5          | 2.3           |
| 83 | 0.7           | 0.5          | 2.4           |
| 84 | 0.4           | 1.75         | 2.4           |
| 85 | 0.5           | 1.35         | 2.45          |
| 86 | 1.5           | 0.75         | 2.75          |
| 87 | 0.5           | 1.35         | 2.8           |
| 88 | 1             | 0.5          | 3             |
| 89 | 0.95          | 1.5          | 3             |
|    | med klf4 cyto | med klf4 nuc | med ntc1 cyto |
|    | 0.4           | 0.5          | 0.75          |
